# Supplementary material
Source: publisher figshare collection journal article supplement (https://frontiersin.figshare.com/ndownloader/files/23339744)
Supplement: Supplementary file [file 23339744]

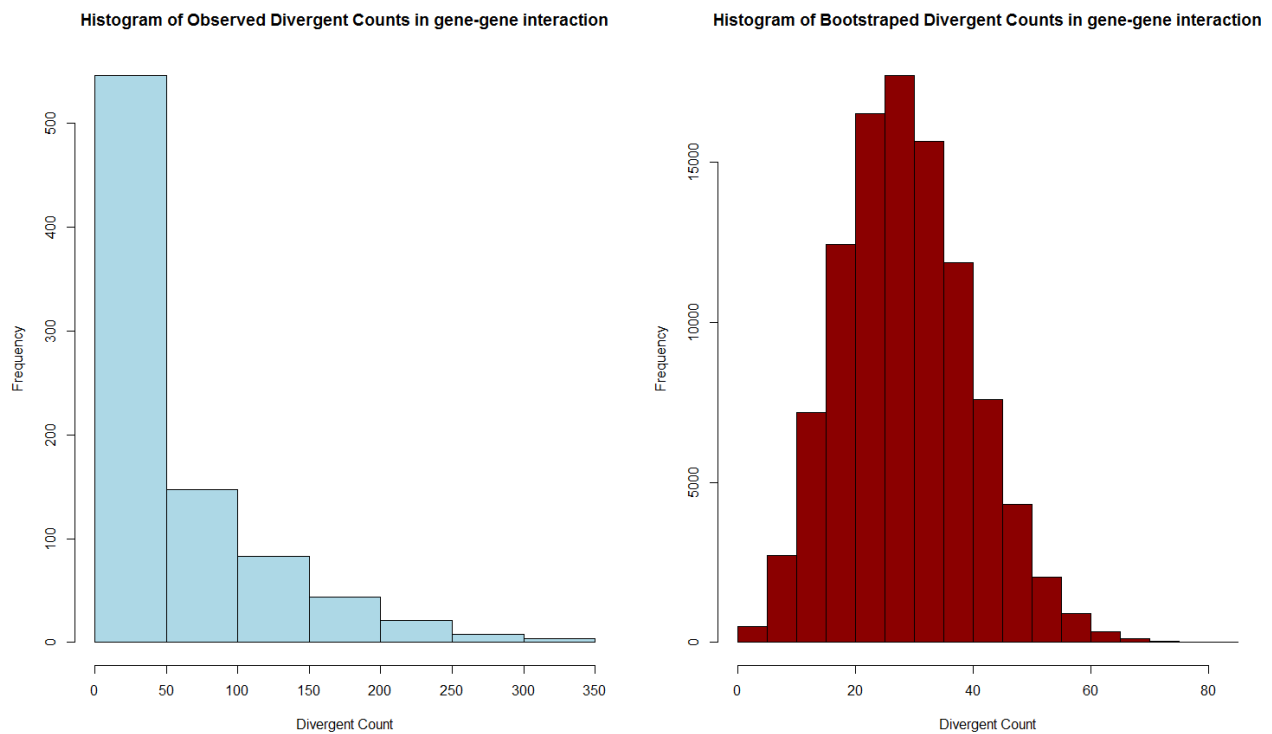

Supplementary figure 2 – Distribution of observed divergent counts for the p-values of the interactions of each of the 853 genes included in the gene-gene interaction analysis(left), Distribution of  $10^5$  divergent counts generated by sampling 853 p-values at a time and calculating the divergent counts from the gene-gene interaction p-values(right). Overall, the empirical and bootstrapped distribution are completely different, indicating we are modelling real interactions.
